# Supplementary material for: Customized CO2 electroreduction to methane or ethylene by manipulating *H and *CO adsorption on Cu/CeOx catalysts
Source: Royal Society of Chemistry journal article supplement (doi:10.1039/d4ta01808g), 2024-01-01
Supplement: d4ta01808g1.pdf [file d4ta01808g1.pdf]

## Supporting Information

### **Customized CO<sub>2</sub> electroreduction to methane or ethylene by manipulating \*H and \*CO adsorption on Cu/CeO<sub>x</sub> catalysts**

T. H. Yang, Y. B. Zhang, Z. C. Huang, Prof. J. P. Yang, Prof. M. Kuang

State Key Laboratory for Modification of Chemical Fibers and Polymer Materials, College  
of Materials Science and Engineering, Donghua University, Shanghai 201620, China

E-mail: [jianpingyang@dhu.edu.cn](mailto:jianpingyang@dhu.edu.cn), [mkuang@dhu.edu.cn](mailto:mkuang@dhu.edu.cn)

## Chemicals and Materials

The chemical reagents and suppliers used in this article are listed as follows. HCl was purchased from Sinopharm Chemical Reagent Co., LTD. CuCl was purchased from Shanghai Aladdin Biochemical Technology Co., Ltd.  $\text{Ce}(\text{NO}_3)_3 \cdot 6\text{H}_2\text{O}$  and NaOH were purchased from Shanghai Macklin Biochemical Co., Ltd. Deionized water ( $18.2 \text{ M}\Omega \text{ cm}^{-2}$ ) was used in this work. No further purification is required when all reagents are used.

## Synthesis of Cu/CuCeO<sub>x</sub> nanorods

The Cu/CuCeO<sub>x</sub> nanorods catalysts are prepared according to the previously reported co-precipitation method.<sup>1</sup> Firstly, a certain amount of CuCl was dissolved in 5 mL concentrated hydrochloric acid, then 8 mmol  $\text{Ce}(\text{NO}_3)_3 \cdot 6\text{H}_2\text{O}$  was added into the solution, and the mixture solution was stirring magnetically until it is fully dissolved to form a dark green solution. At the same time, 140 mL of NaOH solution (38.4 g) was prepared. After cooled to room temperature, the NaOH solution was added to the hydrochloric acid solution of CuCl and  $\text{Ce}(\text{NO}_3)_3 \cdot 6\text{H}_2\text{O}$  under vigorous stirring, followed by continuous stirring for 30 min to form a brownish yellow suspension. The above steps are carried out under the protection of a nitrogen atmosphere at 30 °C. After the reaction, the suspension was centrifuged, washed alternately with ethanol and deionized water to neutral, dried at 60 °C overnight and then calcined at 500 °C for 2 h. The obtained Cu/CuCeO<sub>2-x</sub> nanorods with different copper mass content of 10%, 30% and 50% (the content percentage means the mass percentage of Cu/(Cu+Ce)) were marked as Cu<sub>0.1</sub>/CuCeO<sub>x</sub>, Cu<sub>0.3</sub>/CuCeO<sub>x</sub>, and

$\text{Cu}_{0.5}/\text{CuCeO}_x$ , respectively. In addition, pure  $\text{CeO}_x$  and Cu was prepared as a control sample according to the above process without  $\text{CuCl}$  or  $\text{Ce}(\text{NO}_3)_3 \cdot 6\text{H}_2\text{O}$ .

## **Synthesis of $\text{Cu}/\text{CeO}_x$ nanorods**

Based on the synthesis of  $\text{CeO}_x$ , we used the impregnation method by controlling the copper precursor amount to obtain different ratios of  $\text{Cu}/\text{CeO}_x$ . Different ratios of copper precursor salt and 200 mg of cerium dioxide were dispersed in 100 mL of ultrapure water to obtain a homogeneous mixed solution. After standing for 12 hours, it is washed alternately with water and ethanol, dried and calcined, etc.

## **Characterizations**

Transmission electron microscope (TEM) images of the as-synthesized  $\text{Cu}/\text{CuCeO}_x$  and  $\text{Cu}/\text{CeO}_x$  were acquired using JEM-2100 (operated at 200 kV). High-angle annular dark-field scanning transmission electron microscopy (HAADF-STEM) and elemental mapping analysis were performed on Talos F200S operated at 200 kV. XRD was carried out on D8 Advance in the  $2\theta$  range from  $10^\circ$  to  $90^\circ$ .  $^1\text{H}$  nuclear magnetic resonance (NMR) spectra were collected on Bruker AVANCE III 600 MHz nuclear magnetic resonance spectrometer. The elemental valences of  $\text{Cu}/\text{CuCeO}_{2-x}$  were taken on X-ray photoelectron spectrometry (XPS) (Thermo Scientific, ESCALAB 250Xi, Mg X-ray source). The actual Cu loading of prepared catalysts were obtained by an inductively coupled plasma atomic emission spectroscopy (ICP-OES) on Leeman Prodigy. The Raman spectra were obtained with Dilor LabRam-1B microscope Raman spectrometer (France).

## **Electrochemical measurements**

The electrocatalytic performance of Cu/CuCeO<sub>x</sub> toward the CO<sub>2</sub>RR was evaluated in a flow-cell with 1.0 M KOH solution as the electrolyte, and equipped with a gas diffusion electrode (GDE). The cathode and anode were separated by an anion exchange membrane. GDE was the working electrode, Ni foam was the counter electrode, and Ag/AgCl was the reference electrode in all measurements. Before the electrochemical testing, cyclic voltammetry (CV) measurements were conducted in 1.0 M KOH electrolyte, over a potential range of -1.0 to -2.7 V<sub>RHE</sub> with a sweep rate of 100 mV S<sup>-1</sup>, for a total of 5 cycles. Subsequently, linear scanning voltammetry (LSV) was also performed on the catalysts. To prepare the catalyst ink, 8 mg of the catalyst and 2 mg conductive black was dispersed in a mixture of 2 mL acetone and 80 μL Nafion solution. The mixture was then ultrasonicated for 45 min to obtain a homogenous catalyst ink. Subsequently, the catalyst ink was carefully loaded onto the surface of gas diffusion electrode (1×3 cm<sup>2</sup>) using a micropipette (pipette) and dried under ambient conditions. The amount of the catalyst on the electrode was 0.5 mg cm<sup>-2</sup>.

## **CO<sub>2</sub> reduction products analysis**

The gas product was analyzed by an on-line gas chromatography (GC 2060) equipped with flame ionization detector (FID) and thermal conductivity detector (TCD), and using argon (Ar) as the carrier gas. From the standard curves of FID and TCD and the peak areas of the GC, the molar amounts of the gaseous products can be calculated. And the FE of gas

products was calculated as shown in equation (2).

$$FE = \frac{Q_g}{Q_{total}} \times 100\% = \frac{\frac{v}{60 \text{ s min}^{-1}} \times \frac{y}{24.5 \text{ L mol}^{-1}} \times n \times F}{j_{average}} \times 100\%$$

(2)

Where  $v$  is the flow rate of CO<sub>2</sub> gas, which is controlled by the gas flowmeter at 40 sccm;  $y$  is the volume percentage of the target component in the tail gas obtained by the GC 2060;  $n$  is the number of electron transfers required for the conversion of CO<sub>2</sub> to the target product. For the gas phase reduction products H<sub>2</sub>, CO, CH<sub>4</sub> and C<sub>2</sub>H<sub>4</sub>,  $n$  is 2, 2, 8 and 12, respectively;  $F$  (96485 C mol<sup>-1</sup>) is Faradaic constant;  $j_{average}$  is the average current.

The quantification of liquid products was collected using a nuclear magnetic resonance (NMR) spectrometer (Bruker AVANCE III 600 MHz) in D<sub>2</sub>O (deuterated water) with dimethyl sulfoxide (DMSO) as the internal standard. The moles of the liquid product were determined based on the integral areas obtained from NMR spectra and calibration curves. Equation (3) is used to calculate the Faraday efficiency of the liquid phase product.

$$FE = \frac{n c V F}{Q} \times 100\% \quad (3)$$

$n$  is the number of electron transfers required for the conversion of CO<sub>2</sub> to the target product. For the gas phase reduction products HCOOH, CH<sub>3</sub>COOH and C<sub>2</sub>H<sub>5</sub>OH,  $n$  is 2, 8 and 12, respectively;  $c$  is the concentration of a liquid product;  $V$  is the volume of electrolytic liquid;  $F$  (96485 C mol<sup>-1</sup>) is Faradaic constant; and  $Q$  is the amount of charge.

### ***In Situ* FTIR testing**

In-situ FTIR measurement was performed at Thermo IS 50. A sample greater than 10 mg was prepared as a catalyst ink and drop-coated on the silicon crystal. The other conditions were the same as the CO<sub>2</sub> electroreduction performance test. The spectra were collected along with negative-going linear sweep voltammetry (LSV) to -1.8 V<sub>RHE</sub> at a scan rate of 5 mV/s in the scanning range of 1000-3000 cm<sup>-1</sup>.

### ***In Situ Raman testing***

In-situ Raman measurement was performed at Horiba Jobin Yvon HR evolution system, with air-cooled light source of 532 nm. In situ Raman experiment was performed at a potential of -0.6 V to -1.6 V<sub>RHE</sub>, and 1.0 M KOH aqueous solution was circulated in the cathode cavity through a peristaltic pump while the CO<sub>2</sub> flow rate was maintained at 20 sccm by a mass flow controller.

### **Computational details**

All the density functional theory calculations presented in this paper are performed based on the Vienna Ab-initio Simulation Package (VASP)<sup>2, 3</sup> with the projected augmented wave (PAW) plane-wave method.<sup>4</sup> The electron exchange correlation energy is described using the Perdew-Burke-Ernzerhof (PBE) functional in the generalized gradient approximation (GGA).<sup>5</sup> The cutoff energy was set at 450 eV, and Monkhorst Pack k-point grids of 2 × 2 × 1 meshes were used for the surface. To avoid the effects of periodic image interactions, a 15 Å vacuum layer was added in the Z direction. Structural relaxation stops

until the required self-consistency accuracy of  $10^{-5}$  eV and force of  $0.02$  eV  $\text{\AA}^{-1}$  were achieved. For catalyst relaxation, the top three layers of  $\text{CeO}_2$  substrate were relaxed and the bottom three layers were fixed.

## Supplementary Figures

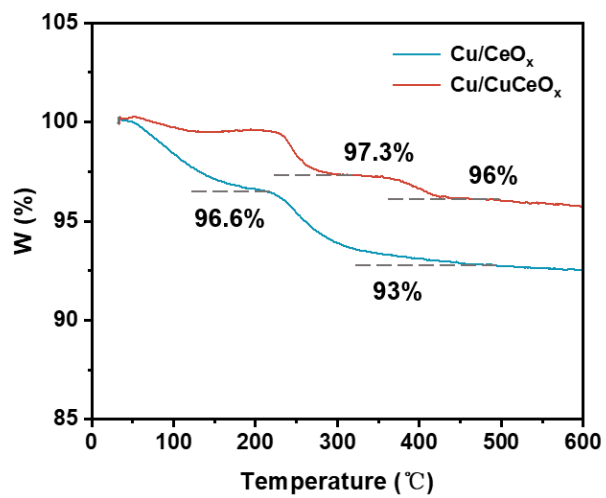

**Figure S1** The thermogravimetric analysis of Cu/CuCeO<sub>x</sub> and Cu/CeO<sub>x</sub>.



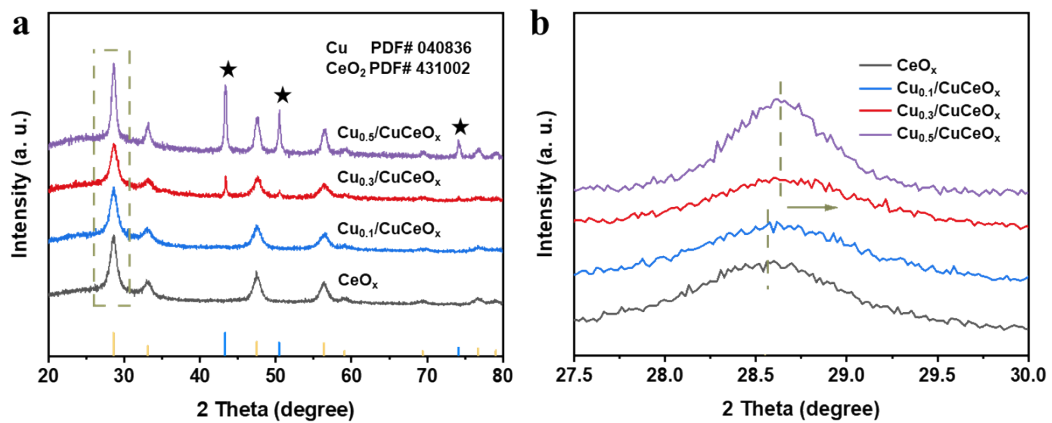

**Figure S2** XRD spectra and layout magnification of Cu<sub>y</sub>/CuCeO<sub>x</sub>.

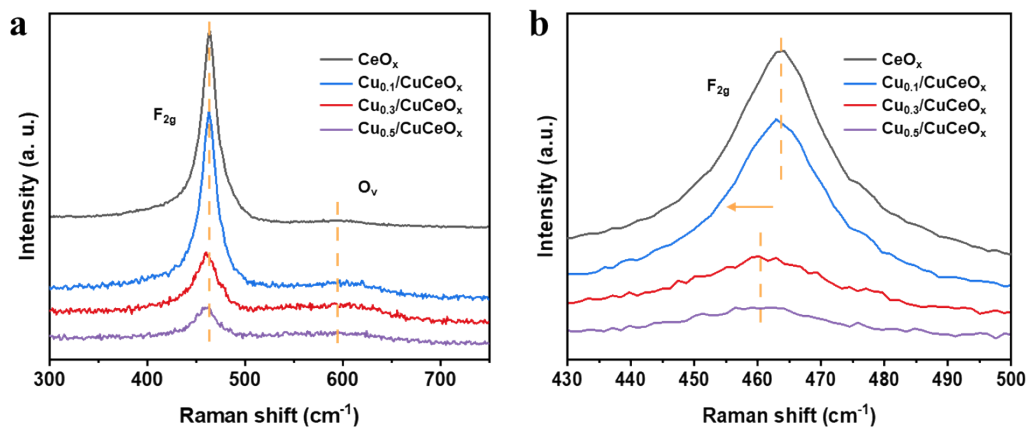

**Figure S3** Raman spectra and layout magnification of  $\text{Cu}_y/\text{CuCeO}_x$ .

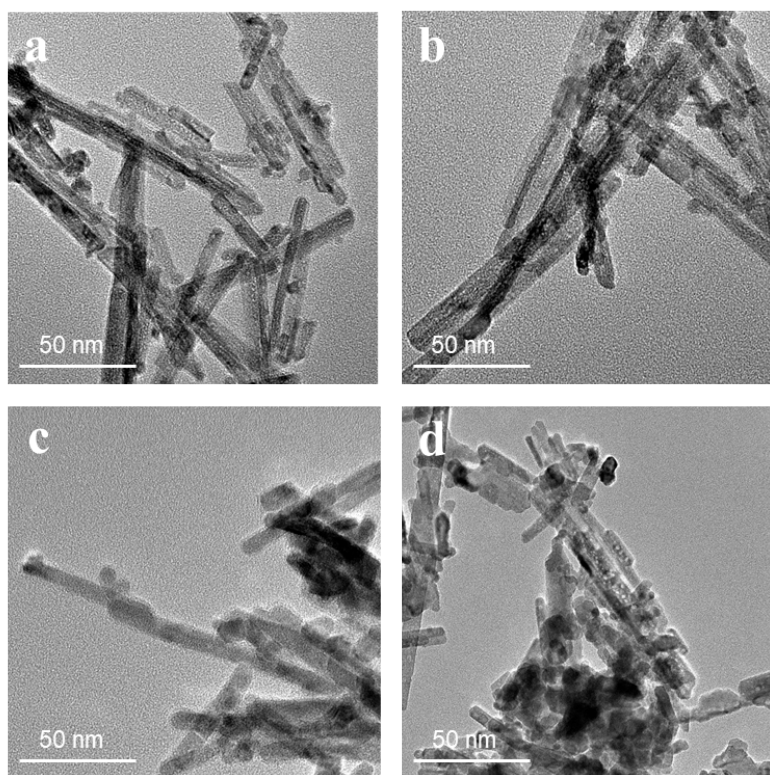

**Figure S4** TEM images of (a) CeO<sub>x</sub>, (b) Cu<sub>0.1</sub>/CuCeO<sub>x</sub>, (c) Cu/CuCeO<sub>x</sub>, and (d) Cu<sub>0.5</sub>/CuCeO<sub>x</sub> nanorods.

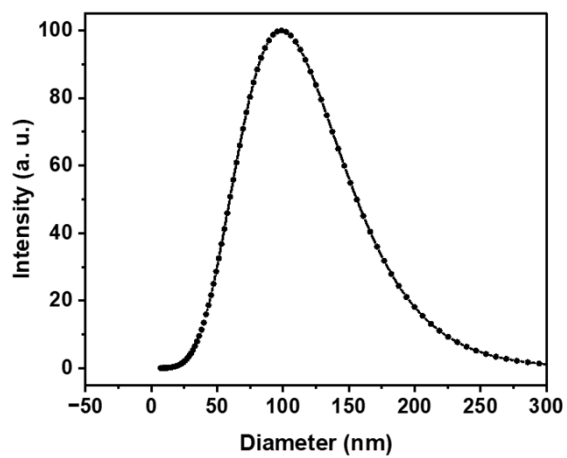

**Figure S5** The dynamic light scattering of CeO<sub>2</sub>.

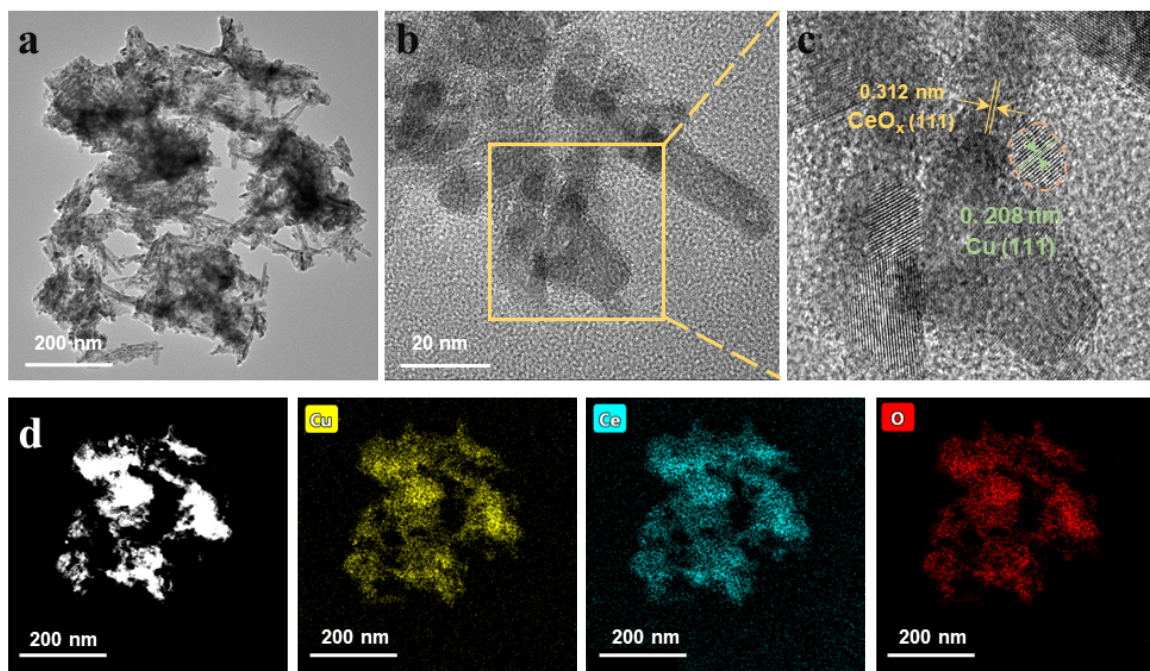

**Figure S6** (a-c) HRTEM images of Cu/CeO<sub>x</sub> nanorods by impregnation method. (d) EDX elemental distribution mapping images of Cu/CeO<sub>x</sub> nanorods.

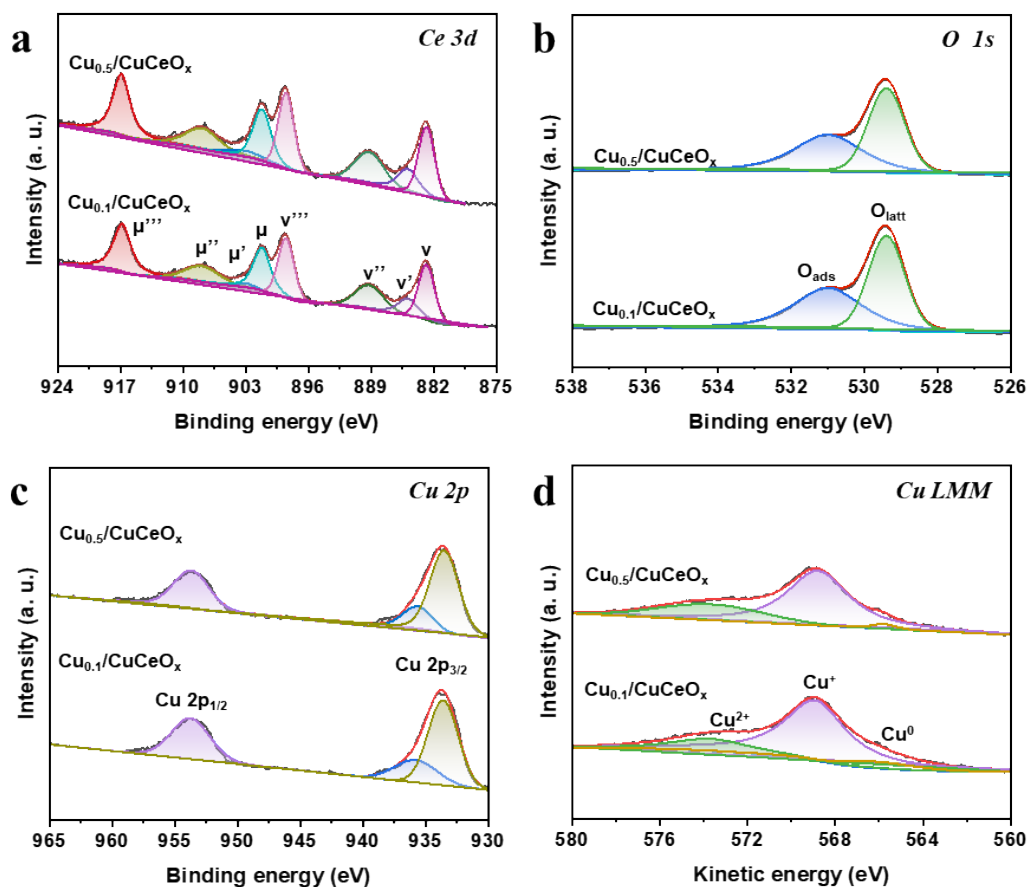

**Figure S7** XPS analysis of (a) Ce 3d, (b) O 1s, (c) Cu 2p and (d) Cu LMM for  $\text{Cu}_{0.1}/\text{CuCeO}_x$  and  $\text{Cu}_{0.5}/\text{CuCeO}_x$ .

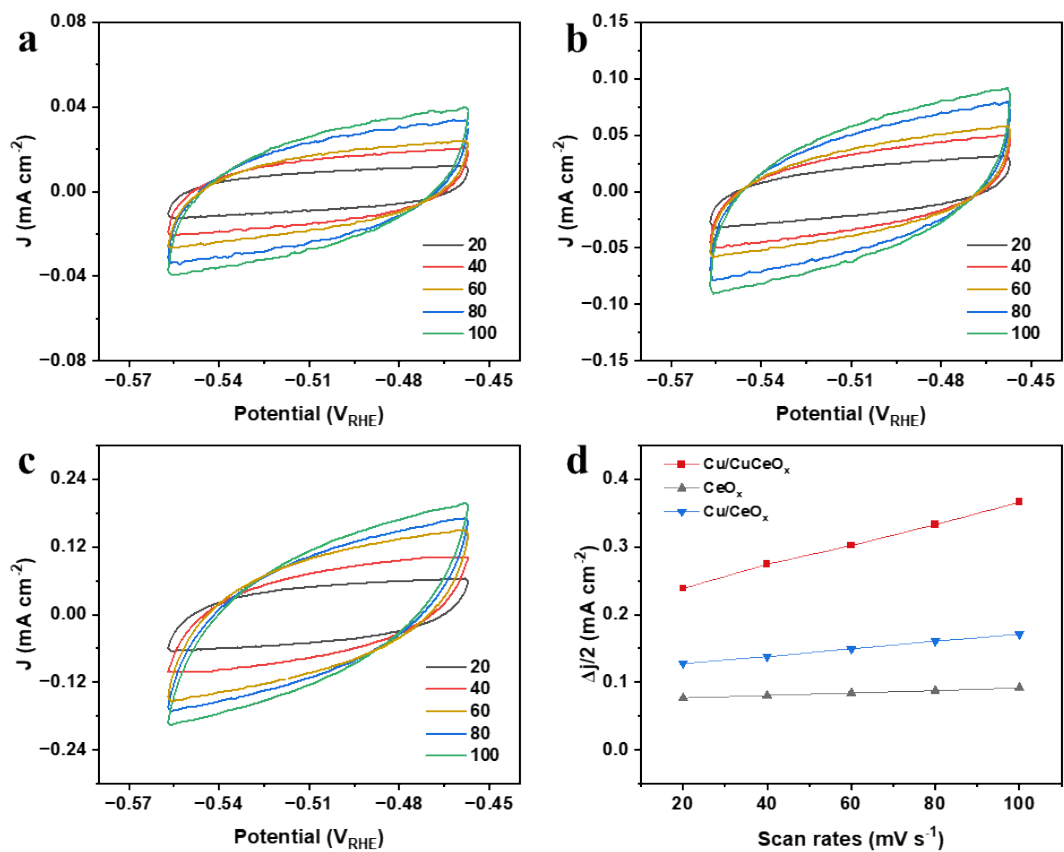

**Figure S8** The cyclic voltammogram of (a)  $\text{CeO}_x$  and (b)  $\text{Cu/CeO}_x$  (c)  $\text{Cu/CuCeO}_x$  (d) the corresponding ECSAs of  $\text{CeO}_x$ ,  $\text{Cu/CeO}_x$ ,  $\text{Cu/CuCeO}_x$ .

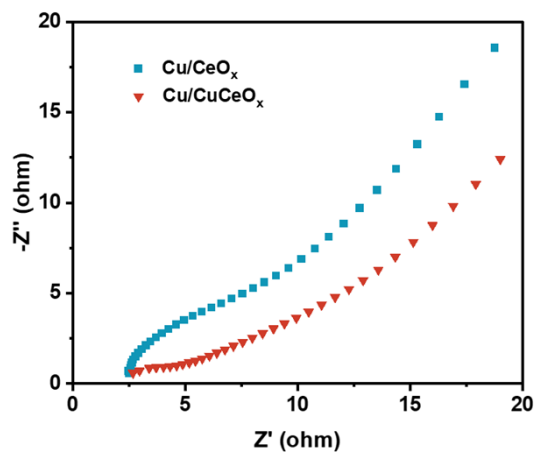

**Figure S9** The impedance spectra of Cu/CeO<sub>x</sub> and Cu/CuCeO<sub>x</sub>.



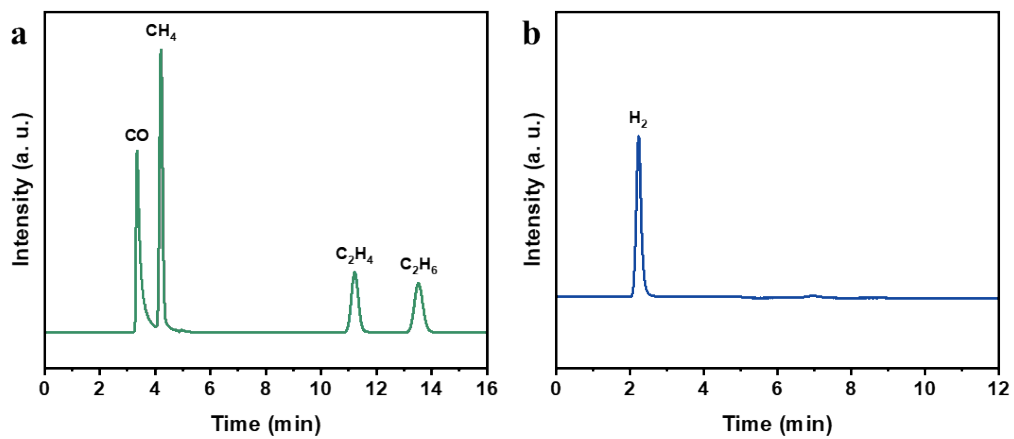

**Figure S10** (a) FID and (b) TCD signals detected by GC 2060 of standard gases.

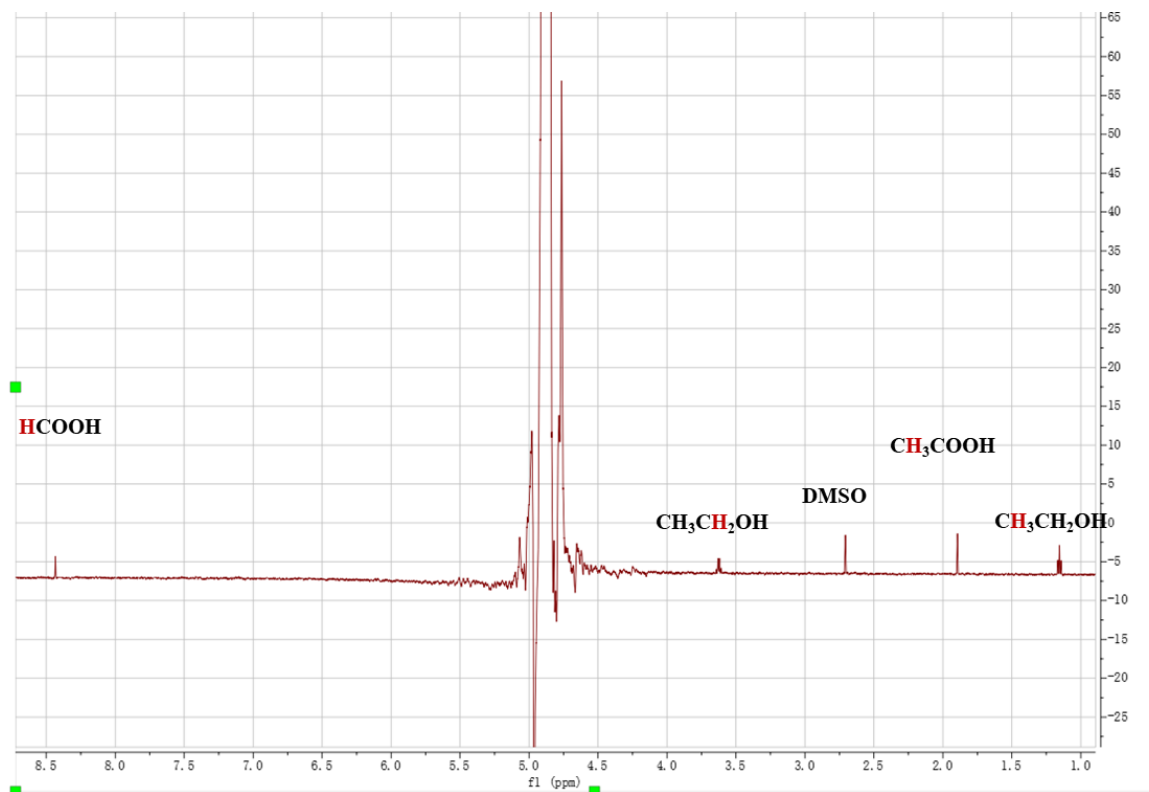

**Figure S11** A typical  $^1\text{H}$  NMR spectrum of the  $\text{Cu}/\text{CuCeO}_x$  catalyzed  $\text{CO}_2$  electroreduction at  $-1.2 V_{\text{RHE}}$ .

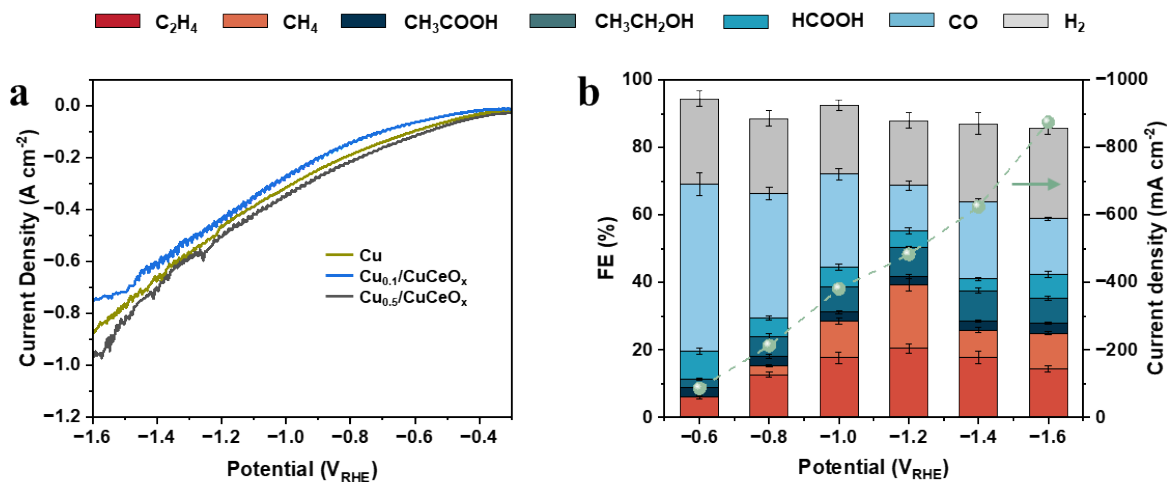

**Figure S12** (a) LSV spectra of Cu and Cu<sub>y</sub>/CuCeO<sub>x</sub> nanorods catalysts. FEs of products at different applied potentials in 1.0 M KOH electrolyte for Cu.

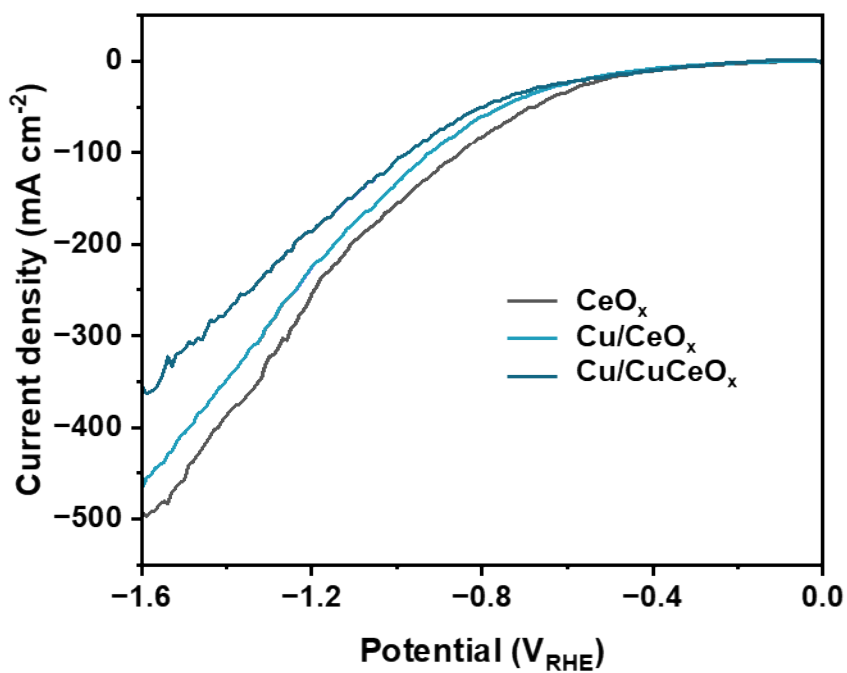

**Figure S13** LSV spectra of nanorods catalysts in Ar-saturated 1.0 M KOH electrolytes.

■ C<sub>2</sub>H<sub>4</sub>  
 ■ CH<sub>4</sub>  
 ■ CH<sub>3</sub>COOH  
 ■ CH<sub>3</sub>CH<sub>2</sub>OH  
 ■ HCOOH  
 ■ CO  
 ■ H<sub>2</sub>

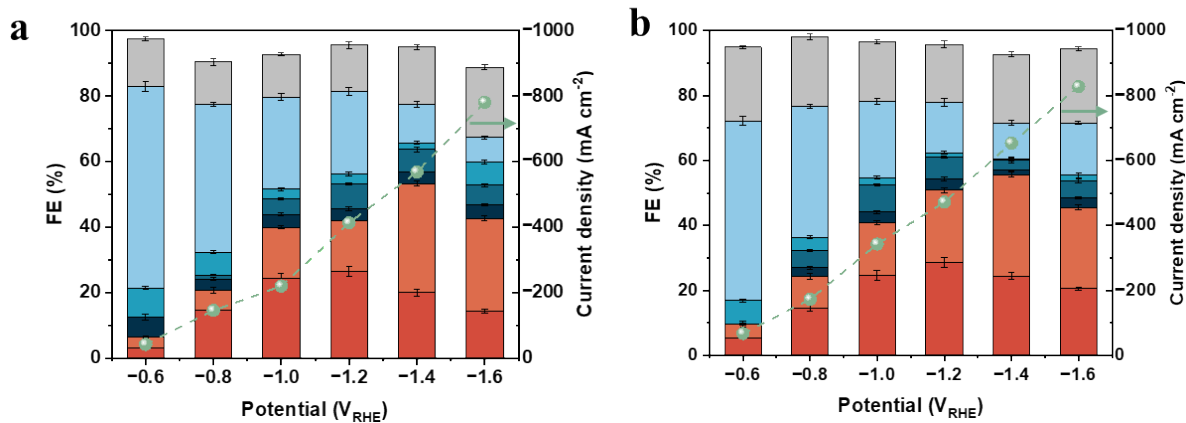

**Figure S14** FEs of products at different applied potentials in 1.0 M KOH electrolyte for (a) Cu<sub>0.1</sub>/CuCeO<sub>x</sub>, (b) Cu<sub>0.5</sub>/CuCeO<sub>x</sub>.

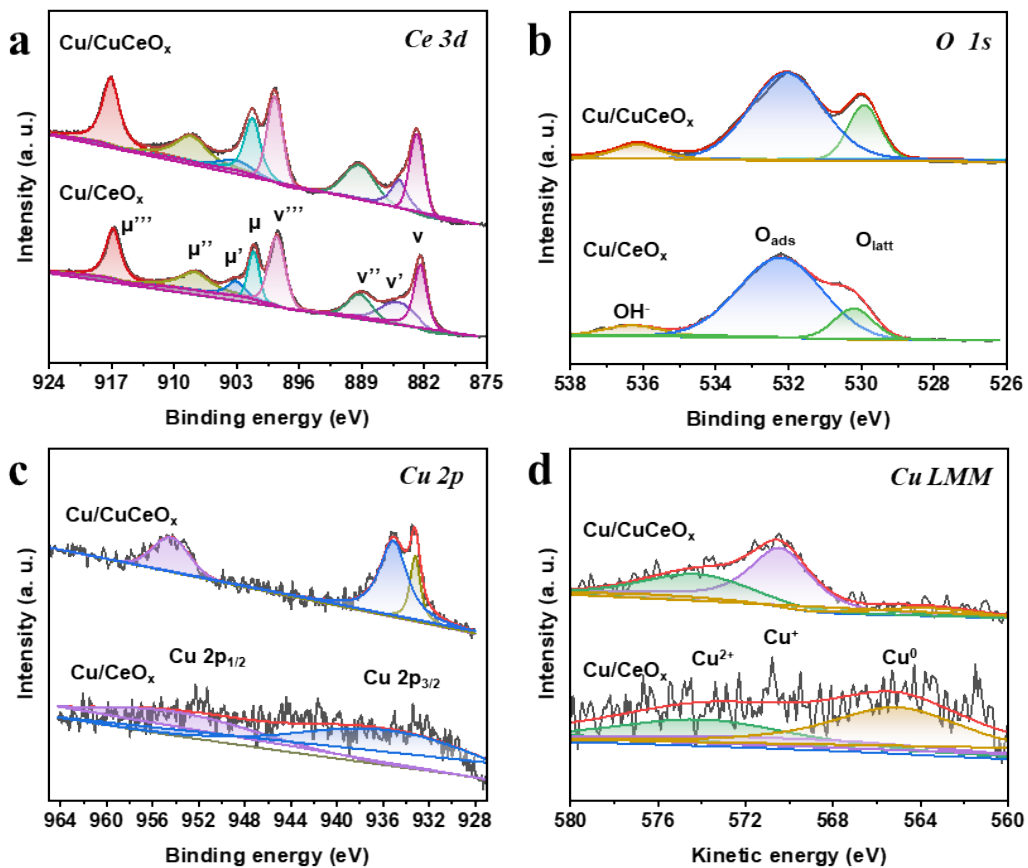

**Figure S15** XPS analysis of (a) Ce 3d, (b) O 1s, (c) Cu 2p and (d) Cu LMM of Cu/CuCeO<sub>x</sub> and Cu/CeO<sub>x</sub> after CO<sub>2</sub>RR.

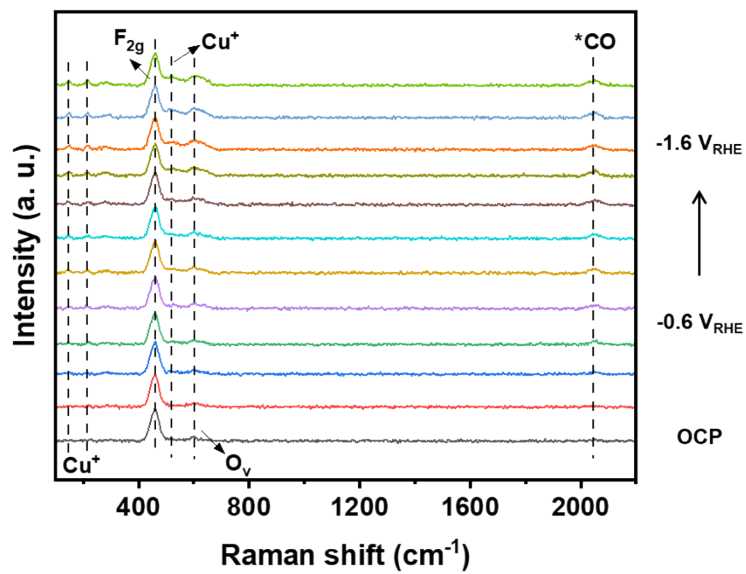

**Figure S16** In situ Raman spectra of Cu/CuCeO<sub>x</sub> observed in the range of 100 to 2200 cm<sup>-1</sup> at different applied potentials.

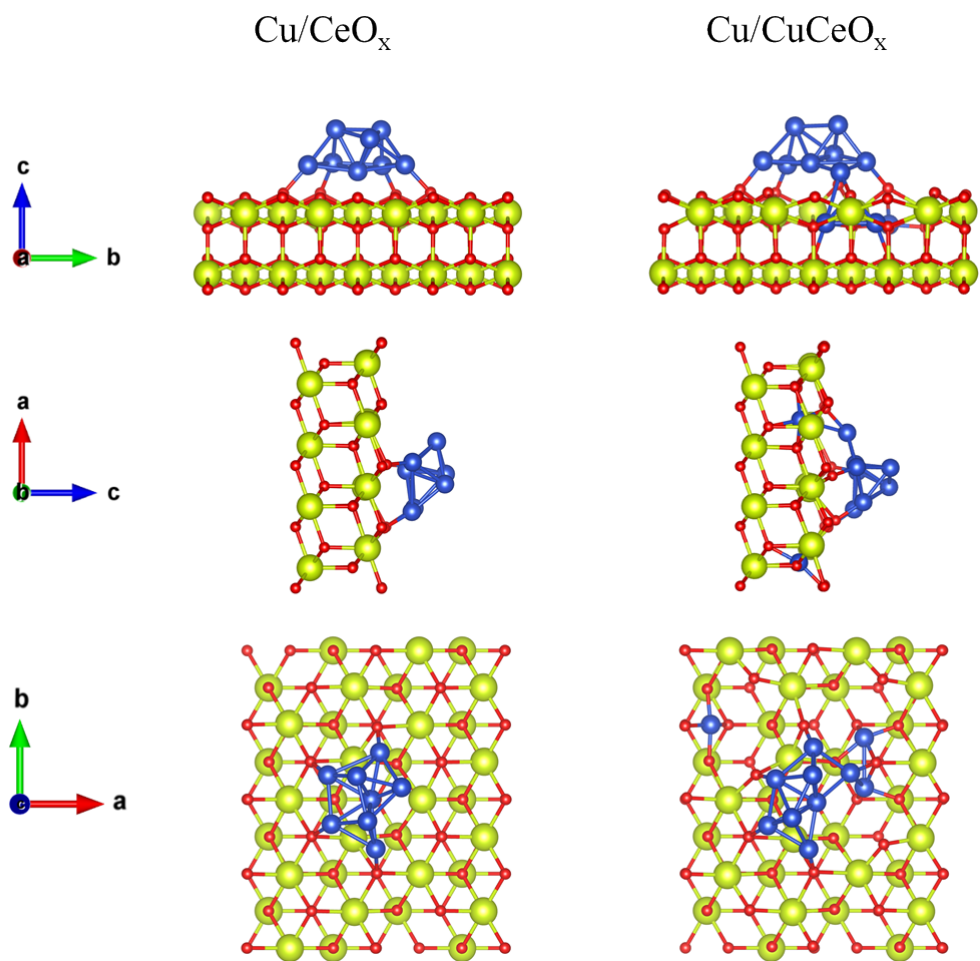

**Figure S17** Schematic diagram of  $\text{Cu/CeO}_x$  and  $\text{Cu/CuCeO}_x$  cells in different directions. The atoms green, blue and red represent Ce, Cu, and O, respectively.



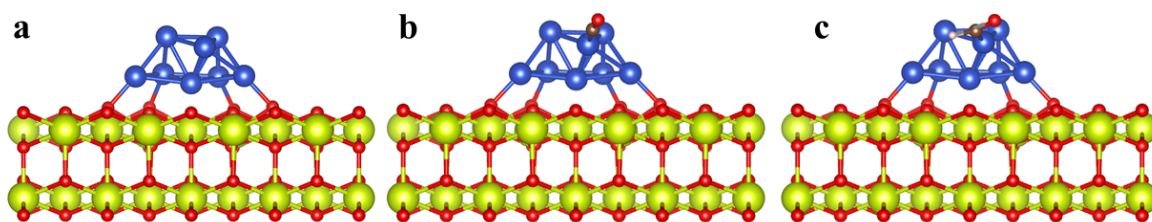

**Figure S18** The optimized adsorption configurations of reaction intermediates for C<sub>1</sub> on the Cu/CeO<sub>x</sub> (111) structure. (a) Cu/CeO<sub>x</sub>, (b) \*CO, (c) \*CHO. The atoms green, blue, brown, red and white represent Ce, Cu, C, O, and H, respectively.

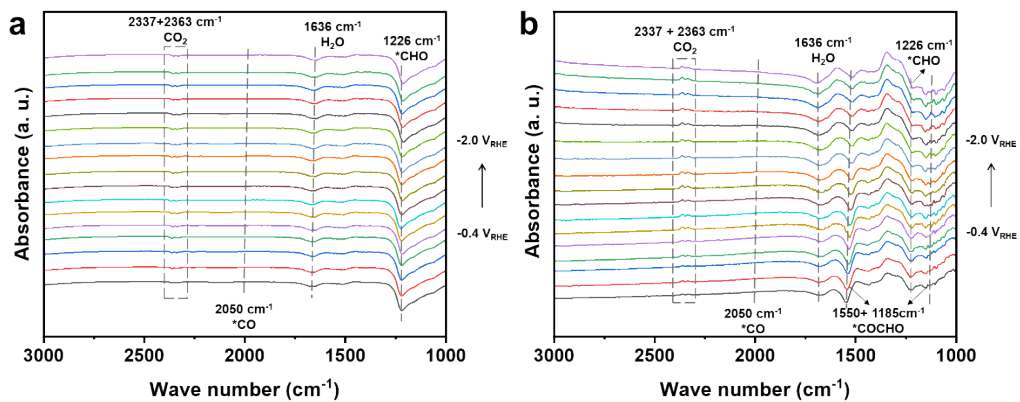

**Figure S19** *In-situ* FTIR spectra of (a)  $\text{Cu}/\text{CeO}_x$  and (b)  $\text{Cu}/\text{CuCeO}_x$  catalyst collected at different potentials.

**Table S1** Summary of ICP and XPS results.

| <b>Sample</b>                                            | <b>Cu/(Cu+Ce)</b> | <b>Ce<sup>3+</sup>/Ce</b> | <b>OV<sub>s</sub> %</b> | <b>Cu<sup>+</sup>/Cu<sup>δ+</sup></b> |
|----------------------------------------------------------|-------------------|---------------------------|-------------------------|---------------------------------------|
| CeO <sub>x</sub>                                         | /                 | 0.1053                    | 0.152                   | /                                     |
| Cu                                                       | /                 | /                         | /                       | 0.670                                 |
| Cu/CeO <sub>x</sub>                                      | 0.288             | 0.114                     | 0.163                   | 0.561                                 |
| Cu <sub>0.3</sub> /CeO <sub>x</sub> - CO <sub>2</sub> RR | /                 | 0.083                     | 0.132                   | 0.210                                 |
| Cu <sub>0.1</sub> /CuCeO <sub>x</sub>                    | 0.098             | 0.069                     | 0.161                   | 0.752                                 |
| Cu/CuCeO <sub>x</sub>                                    | 0.301             | 0.128                     | 0.293                   | 0.780                                 |
| Cu/CuCeO <sub>x</sub> - CO <sub>2</sub> RR               | /                 | 0.107                     | 0.241                   | 0.663                                 |
| Cu <sub>0.5</sub> /CuCeO <sub>x</sub>                    | 0.486             | 0.122                     | 0.166                   | 0.721                                 |

The Cu/(Cu+Ce) ratio estimated by ICP analysis; The Ce<sup>3+</sup>/Ce, OV<sub>s</sub> and Cu<sup>+</sup>/Cu<sup>δ+</sup> ratio obtained from the Ce 3d, O1s and Cu LMM XPS result.

**Table S2** Ce 3d XPS results. The listed-out figures are the bind energies (BE) and the area of each peak.

| peak | Binding Energy (eV)                 | CeO <sub>x</sub> | Cu <sub>0.1</sub> /CuCeO <sub>x</sub> | Cu/CuCeO <sub>x</sub> | Cu <sub>0.5</sub> /CuCeO <sub>x</sub> |
|------|-------------------------------------|------------------|---------------------------------------|-----------------------|---------------------------------------|
| μ''' | 916.6-916.9                         | 150754.5         | 204966.5                              | 239336.6              | 20329.41                              |
| μ''  | 907.5-907.7                         | 138632           | 134444.1                              | 198733.8              | 11767.9                               |
| μ'   | 903.5-904.2                         | 26110.69         | 18754.91                              | 52300.69              | 5268.183                              |
| μ    | 900.6-901                           | 104514.2         | 217634.5                              | 207280.5              | 10072.37                              |
| ν''' | 898.2-898.5                         | 164187.1         | 212508                                | 248005.1              | 21848.11                              |
| ν''  | 889.1-889.3                         | 118230.2         | 196233.8                              | 149727.7              | 11151.09                              |
| ν'   | 885.1-885.8                         | 69941.7          | 71772.02                              | 141931.2              | 9331.582                              |
| ν    | 882.2-882.6                         | 139634.5         | 252735.7                              | 277080.1              | 30146.67                              |
|      | Ce <sup>4+</sup>                    | 815952.5         | 1218522.6                             | 1320163.8             | 105315.55                             |
|      | Ce <sup>3+</sup>                    | 96052.39         | 90526.93                              | 194231.89             | 14599.765                             |
|      | Ce <sup>3+</sup> / Ce <sup>4+</sup> | 0.1177181        | 0.07429237                            | 0.14712711            | 0.13862788                            |
|      | Ce <sup>3+</sup> /Ce                | 0.10532          | 0.06915                               | 0.128257              | 0.12175                               |

**Table S3** O 1s XPS results. The area percent of each deconvoluted peak at different BE are

| Catalysts                         | Electrolyte | Products   | FE          | FE <sub>C<sub>2</sub>H<sub>4</sub></sub> / | Potential | j <sub>partical</sub> | Ref. |
|-----------------------------------|-------------|------------|-------------|--------------------------------------------|-----------|-----------------------|------|
| O <sub>latt</sub> /A <sub>L</sub> | 528.9–529.2 | 171016.2   | 169750.2    | 28155.22                                   | 172466.8  |                       |      |
| O <sub>ad</sub> /A <sub>S</sub>   | 530.8–531.3 | 75048.52   | 80518.78    | 39935.29                                   | 85642.26  |                       |      |
| OH <sup>-</sup>                   | 533.3–533.6 | 0          | 0           | 0                                          | 0         |                       |      |
| Oxygen vacancy (%)                |             | 0.15249752 | 0.160864483 | 0.2932515                                  | 0.165903  |                       |      |

$$\text{Oxygen vacancy (\%)} = \frac{1}{2A_s + A_L} \times 100$$

(4)

|                                   |                                          |                               |      | $FE_{CH_4}$ | $(V_{RHE})$ | $(mA\ cm^{-2})$ |           |
|-----------------------------------|------------------------------------------|-------------------------------|------|-------------|-------------|-----------------|-----------|
| Ag <sub>1</sub> /CeO <sub>2</sub> | [C4mim][BF <sub>4</sub> ]<br>(1.2M)/MeCN | CO                            | 97.2 | /           | /           | 403             | 6         |
| Cu/CeO <sub>2</sub> @CNF          | 1.0 M KOH                                | CO                            | 59.2 | /           | -0.6        | 59.2            | 7         |
| Au-CeO <sub>2</sub>               | 0.5 M KHCO <sub>3</sub>                  | CO                            | 97   | /           | -0.6        | 16              | 8         |
| Cu/CeO <sub>2</sub> -R            | 0.1 M KHCO <sub>3</sub>                  | CH <sub>4</sub>               | 49.3 | /           | -1.6        | 7.888           | 9         |
| Cu/CeO <sub>2</sub>               | 1.0 KOH                                  | CH <sub>4</sub>               | 67   | /           | /           | 364             | 10        |
| Cu/CeO <sub>2-x</sub>             | 0.1 M KHCO <sub>3</sub>                  | CH <sub>4</sub>               | 54   | /           | -1.2        | /               | 11        |
| Cu/CeO <sub>2</sub>               | 1.0 M KOH                                | CH <sub>4</sub>               | 42   | /           | -0.89       | 51              | 12        |
| Cu-CeO <sub>2-x</sub>             | 0.1 M KHCO <sub>3</sub>                  | CH <sub>4</sub>               | 58   | /           | -1.8        | 70              | 13        |
| Cu/Ce-MOFs                        | 0.1 M KHCO <sub>3</sub>                  | CH <sub>4</sub>               | 57.9 | /           | -1.3        | 36.635          | 14        |
| Cu/CeO <sub>2</sub>               |                                          |                               |      |             |             |                 |           |
| Ce-Cu <sub>2</sub> O              | 0.5 M KHCO <sub>3</sub>                  | C <sub>2</sub> H <sub>4</sub> | 25   | /           | -1.3        | 9.035           | 15        |
| CuO/CeO <sub>2</sub> /CB          | 0.1 M KHCO <sub>3</sub>                  | C <sub>2</sub> H <sub>4</sub> | 50   | /           | -1.1        | 5.0             | 16        |
| Cu/CeO <sub>2</sub> (110)         | 0.1 M KHCO <sub>3</sub>                  | C <sub>2</sub> H <sub>4</sub> | 39.1 | /           | -1.05       | 2.5             | 17        |
| Cu/CeO <sub>2</sub>               | 0.1 M CsHCO <sub>3</sub>                 | CH <sub>4</sub>               | 17.4 | 2.7528      | -1.14       | /               | 18        |
|                                   |                                          | C <sub>2</sub> H <sub>4</sub> | 47.9 |             | -1.1        |                 |           |
| 5-CuO/CeO <sub>2</sub>            | 0.1 M KHCO <sub>3</sub>                  | CH <sub>4</sub>               | 37.8 | /           | -1.27       | 8.7             | 19        |
| 60-CuO/CeO <sub>2</sub>           |                                          | C <sub>2</sub> H <sub>4</sub> | 44.8 | /           | -1.27       | 11.8            |           |
| Cu-CeO <sub>2</sub> SA            | 1.0 M KOH                                | CH <sub>4</sub>               | 45.5 | 0.9494      | -0.9        | 80              | 20        |
| Cu-CeO <sub>2</sub> NP            |                                          | C <sub>2</sub> H <sub>4</sub> | 43.2 |             | -0.9        | 115             |           |
| Cu <sub>y</sub> /CeO <sub>2</sub> | 0.1 M KHCO <sub>3</sub>                  | CH <sub>4</sub>               | 58   | 0.724       | -1.3        | 4.35            | 21        |
|                                   |                                          | C <sub>2</sub> H <sub>4</sub> | 42   |             | -1.2        | 7.14            |           |
| CuO/CeO <sub>2</sub>              | 0.1 M KHCO <sub>3</sub>                  | C <sub>2</sub>                | 62.2 | /           | -1.4        | 4.5             | 22        |
| Cu/CuCeO <sub>x</sub>             | 1.0 M KOH                                | C <sub>2</sub> H <sub>4</sub> | 40.2 | 3.77        | -1.2        | 245.66          | This work |

**Table S4** Comparison of CO<sub>2</sub>RR between Ce/CeO<sub>2</sub> and other reported catalysts.

## Reference

1. X. Guo, W. Ye, Z. a. Chen, A. Zhou, D. Jin and T. Ma, *Appl. Catal. B: Environ.*, 2022, **310**, 121334.
2. G. Kresse and J. Furthmüller, *Comp. Mater. Sci.*, 1996, **6**, 15-50.
3. G. Kresse and J. Furthmüller, *Phys. Rev. B Condens. Matter.*, 1996, **54**, 11169-11186.
4. P. E. Blöchl, *Phys. Rev. B*, 1994, **50**, 17953-17979.
5. J. P. Perdew, K. Burke and M. Ernzerhof, *Phys. Rev. Lett.*, 1996, **77**, 3865-3868.
6. Y. Liang, C. Wu, S. Meng, Z. Lu, R. Zhao, H. Wang, Z. Liu and J. Wang, *ACS Appl. Mater.*, 2023, **15**, 30262-30271.
7. X. Zong, J. Zhang, J. Zhang, W. Luo, A. Züttel and Y. Xiong, *Electrochem. Commun.*, 2020, **114**, 106716.
8. J. Fu, D. Ren, M. Xiao, K. Wang, Y. Deng, D. Luo, J. Zhu, G. Wen, Y. Zheng, Z. Bai, L. Yang and Z. Chen, *ChemSusChem*, 2020, **13**, 6621-6628.
9. L. Xue, C. Zhang, J. Wu, Q.-Y. Fan, Y. Liu, Y. Wu, J. Li, H. Zhang, F. Liu and S. Zeng, *Appl. Catal. B: Environ.*, 2022, **304**, 120951.
10. Y. Jiang, K. Mao, J. Li, D. Duan, J. Li, X. Wang, Y. Zhong, C. Zhang, H. Liu, W. Gong, R. Long and Y. Xiong, *ACS Nano*, 2023, **17**, 2620-2628.
11. S. B. Varandili, J. Huang, E. Oveisi, G. L. De Gregorio, M. Mensi, M. Strach, J. Vavra, C. Gadiyar, A. Bhowmik and R. Buonsanti, *ACS Catal.*, 2019, **9**, 5035-5046.
12. K. K. Patra, Z. Liu, H. Lee, S. Hong, H. Song, H. G. Abbas, Y. Kwon, S. Ringe and J. Oh, *ACS Catal.*, 2022, **12**, 10973-10983.
13. Y. Wang, Z. Chen, P. Han, Y. Du, Z. Gu, X. Xu and G. Zheng, *ACS Catal.*, 2018, **8**, 7113-7119.
14. Q. Deng, Y. Yang, W. Zhao, Z. Tang, K. Yin, Y. Song and Y. Zhang, *J. Colloid and Interf. Sci.*, 2023, **651**, 883-893.
15. Y. Sun, J. Xie, Z. Fu, H. Zhang, Y. Yao, Y. Zhou, X. Wang, S. Wang, X. Gao, Z. Tang, S. Li, X. Wang, K. Nie, Z. Yang and Y.-M. Yan, *ACS Nano*, 2023, **17**, 13974-13984.
16. S. Chu, X. Yan, C. Choi, S. Hong, A. W. Robertson, J. Masa, B. Han, Y. Jung and Z. Sun, *Green Chem.*, 2020, **22**, 6540-6546.
17. X. L. Senlin Chu, Alex W. Robertson, Zhenyu Sun., *Acta Phys. -Chim. Sin.* , 2021, **37**, 2009023.
18. C. W. Lee, S.-J. Shin, H. Jung, D. L. T. Nguyen, S. Y. Lee, W. H. Lee, D. H. Won, M. G. Kim, H.-S. Oh, T. Jang, H. Kim, B. K. Min and Y. J. Hwang, *ACS Energy Lett.*, 2019, **4**, 2241-2248.
19. Y. Zhang, K. Li, M. Chen, J. Wang, J. Liu and Y. Zhang, *ACS Appl. Nano Mater.*, 2020, **3**, 257-263.
20. S. Hong, H. G. Abbas, K. Jang, K. K. Patra, B. Kim, B.-U. Choi, H. Song, K.-S. Lee, P.-P. Choi, S. Ringe and J. Oh, *Adv. Mater.*, 2023, **35**, 2208996.

21. J. Yin, Z. Gao, F. Wei, C. Liu, J. Gong, J. Li, W. Li, L. Xiao, G. Wang, J. Lu and L. Zhuang, *ACS Catal.*, 2022, **12**, 1004-1011.
22. Y. Tian, X. Fei, H. Ning, W. Wang, X. Tan, X. Wang, Z. Ma, Z. Guo and M. Wu, *Front. in Chem.*, 2022, **10**, 915759.
